# Supplementary material for: EURO-SUPREME: sub-daily precipitation extremes in the EURO-CORDEX ensemble
Source: Copernicus journal article supplement (doi:10.5194/essd-2025-30), 2025-03-05
Supplement: Supplementary file 1 [file essd-2025-30-supplement.pdf]

## *Supplement of*

# **“EURO-SUPREME: sub-daily precipitation extremes in the EURO-CORDEX 0.11 ° ensemble”**

**ANOUK DIERICKX, WOUT DEWETTINCK, BERT VAN SCHAEYBROECK, LELSEY DE CRUZ, STEVEN CALUWAERTS, PIET TERMONIA AND HANS VAN DE VYVER**

### **CONTENTS**

- Table S1 to S4
- Figure S1
- References

**Table S1.** Spatial domain and simulation periods of the RCMs that contributed to EURO-SUPREME. Note that RCM-downscaling from MOHC-HadGEM2-ESM ends in 2099 instead of 2100.

| RCM            | Spatial dimension | Min/max longitude and latitude | Historical period      | Future period |
|----------------|-------------------|--------------------------------|------------------------|---------------|
| ALADIN63       | 453 x 453         | 52° W–73° E and 21° N–74° N    | 1951–2005 <sup>1</sup> | 2006–2100     |
| COSMO-crCLIM   | 424 x 412         | 45° W–65° E and 22° N–73° N    | 1950–2005 <sup>2</sup> | 2006–2100     |
| HadREM3-GA7-05 | 424 x 412         | 45° W–65° E and 22° N–73° N    | 1952–2005 <sup>3</sup> | 2006–2100     |
| RCA4           | 424 x 412         | 45° W–65° E and 22° N–73° N    | 1970–2005              | 2006–2100     |
| RegCM4-6       | 527 x 527         | 63° W–82° E and 15° N–76° N    | 1970–2005              | 2006–2100     |
| REMO2015       | 424 x 412         | 52° W–73° E and 21° N–74° N    | 1950–2005              | 2006–2100     |

<sup>1</sup>One run starts from 1950.

<sup>2</sup>Some runs start in 1949 and 1951.

<sup>3</sup>One run ends in 2004 instead of 2005.

**Table S2.** National IDF-statistics for the Netherlands, Denmark and Finland. Shown are the 10-year return levels (mm) for various rainfall durations.

| Country         | 1 h  | 3 h  | 6 h  | 12 h | 24 h | Reference |
|-----------------|------|------|------|------|------|-----------|
| The Netherlands | 31.0 | 39.8 | 46.0 | 52.9 | 62.9 | [1]       |
| Denmark         | 24.9 | 33.3 | 40.2 | 46.7 | 55.2 | [2]       |
| Finland         | 22.9 | 27.0 | 34.0 | 44.0 | 53.0 | [3, 4]    |

**Table S3.** Temporal-areal reduction factors to convert return levels of  $d$ -hourly precipitation extremes of EURO-SUPREME (i.e. 1-h temporal resolution,  $0.11^\circ$  spatial resolution) to return levels of continuous time sliding point maxima. This is taken from [5, Table 2].

| $d = 1$ h | $d = 2$ h | $d = 3$ h | $d = 6$ h | $d = 12$ h |
|-----------|-----------|-----------|-----------|------------|
| 1.21      | 1.09      | 1.06      | 1.02      | 1.01       |

**Table S4.** Periods associated with global warming levels of 1.5 °C and 3 °C for the GCM runs in the EURO-CORDEX ensemble [6].

| GCM run                            | +1.5°C period | +3°C period |
|------------------------------------|---------------|-------------|
| CNRM-CERFACS-CNRM-CM5-r1i1p1       | 2015 - 2044   | 2053 - 2082 |
| ICHEC-EC-EARTH-r12i1p1             | 2012 - 2041   | 2052 - 2081 |
| ICHEC-EC-EARTH-r1i1p1 <sup>1</sup> | 2012 - 2041   |             |
| ICHEC-EC-EARTH-r3i1p1              | 2014 - 2043   | 2051 - 2080 |
| MOHC-HadGEM2-ES-r1i1p1             | 2004 - 2033   | 2037 - 2066 |
| IPSL-IPSL-CM5A-MR-r1i1p1           | 2008 - 2037   | 2040- 2069  |
| MPI-M-MPI-ESM-LR-r1i1p1            | 2014 - 2043   | 2053 - 2082 |
| MPI-M-MPI-ESM-LR-r2i1p1            | 2012 - 2041   | 2051 - 2080 |
| MPI-M-MPI-ESM-LR-r3i1p1            | 2012 - 2041   | 2050 - 2079 |
| NCC-NorESM1-M-r1i1p1               | 2017 - 2046   | 2058 - 2087 |

<sup>1</sup>For ICHEC-EC-EARTH-r1i1p1, the 3°C period is missing, resulting in 33 usable model runs

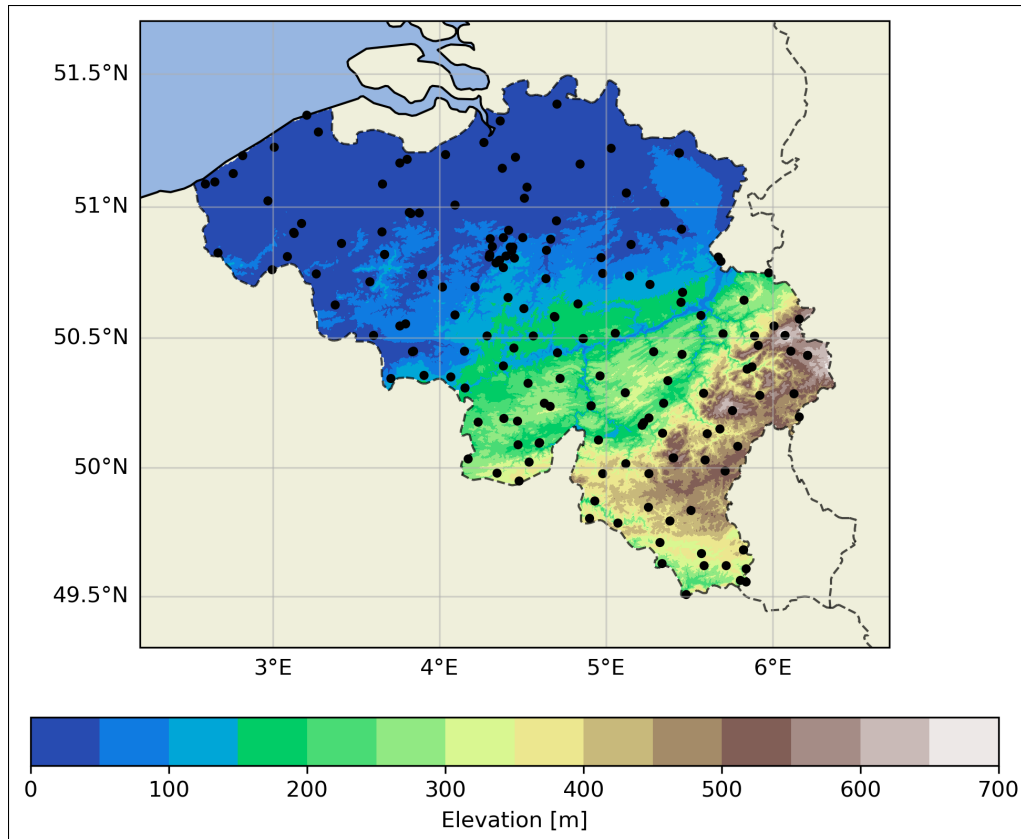

**Fig. S1.** Elevation map of Belgium (m), together with the locations of the (sub-)hourly precipitation stations.

## REFERENCES

1. J. Beersma, R. Versteeg, and H. Hakvoort, "Neerslagstatistieken voor korte duren (precipitation statistics for short durations)," Tech. rep., STOWA (2018).
2. H. Madsen, I. B. Gregersen, D. Rosbjerg, and K. Arnbjerg-Nielsen, "Regional frequency analysis of short duration rainfall extremes using gridded daily rainfall data as co-variate," *Water Sci. Technol.* **75**, 1971–1981 (2017).
3. J. Aaltonen, H. Hohti, K. Jylhä, *et al.*, "Rankkasateet ja taajamatulvat (extreme precipitation and urban flooding)," Tech. rep., RATU (2008).
4. A. Venäläinen, S. Saku, T. Kilpeläinen, *et al.*, "Sään ääriilmiöistä suomessa. (aspects about climate extremes in finland. abstract in english.)," Tech. rep., Ilmatieteen laitos Helsinki, Finland (2007).
5. P. Berg, O. B. Christensen, K. Klehmet, *et al.*, "Summertime precipitation extremes in a EURO-CORDEX 0.11° ensemble at an hourly resolution," *Nat. Hazards Earth Syst. Sci.* **19**, 957–971 (2019).
6. M. Hauser, F. Engelbrecht, and E. M. Fischer, "Transient global warming levels for CMIP5 and CMIP6 (v0.3.0)," Zenodo (2022).
